# Supplementary material for: Selective reduction of CO2 to a methanol equivalent by B(C6F5)3-activated alkaline earth catalysis
Source: Royal Society of Chemistry journal article supplement (doi:10.1039/c4sc00885e), 2014-01-01
Supplement: c4sc00885e1.pdf [file c4sc00885e1.pdf]

## Supplementary Information for

### Selective Reduction of CO<sub>2</sub> to a Methanol Equivalent by B(C<sub>6</sub>F<sub>5</sub>)<sub>3</sub>-activated Alkaline Earth Catalysis

Mathew D. Anker, Merle Arrowsmith, Peter Bellham, Michael S. Hill,\* Gabriele Kociok-Köhn, David J. Liptrot, Mary F. Mahon and Catherine Weetman

*Department of Chemistry, University of Bath, Claverton Down, Bath, BA2 7AY, UK*

#### General Experimental Procedures

All manipulations were carried out using standard Schlenk line and glovebox techniques under an inert atmosphere of either nitrogen or argon. NMR experiments were conducted in Youngs tap NMR tubes made up and sealed in a Glovebox. NMR spectra were collected at 298 K on a Bruker AV300 spectrometer operating at 75.5 MHz (<sup>13</sup>C), 96.3 MHz (<sup>11</sup>B). The spectra were referenced relative to residual solvent resonances. Solvents (toluene, hexane) were dried by passage through a commercially available (Innovative Technologies) solvent purification system, under nitrogen and stored in ampoules over molecular sieves. C<sub>6</sub>D<sub>6</sub>, d<sub>8</sub>-toluene and d<sub>8</sub>-THF were purchased from Fluorochem Ltd. and dried over molten potassium before distilling under nitrogen and storing over molecular sieves. Di-n-butylmagnesium (1.0 M solution in n-heptane), pinacolborane (HBpin), carbon dioxide (CO<sub>2</sub>) and <sup>13</sup>CO<sub>2</sub> were purchased from Sigma-Aldrich Ltd. and tris(pentafluorophenyl)borane was purchased from Alfa Aesar. All were used without further purification. [LMg N(Me<sub>2</sub>)BH<sub>2</sub>N(Me<sub>2</sub>)BH<sub>3</sub>] and [LCa(THF)(N(Me<sub>2</sub>)BH<sub>3</sub>)] (L = HC{(Me)CN(2,6-*i*Pr<sub>2</sub>C<sub>6</sub>H)}<sub>2</sub>) were synthesised by literature procedures.<sup>1</sup>

#### Synthesis of [HC{(Me)CN(2,6-<sup>1</sup>PrC<sub>6</sub>H<sub>3</sub>)}<sub>2</sub>MgHB(C<sub>6</sub>F<sub>5</sub>)<sub>3</sub>], **8**.

In a glovebox, to a stirring solution of [LMg N(Me<sub>2</sub>)BH<sub>2</sub>N(Me<sub>2</sub>)BH<sub>3</sub>] (0.4 mmol, 222 mg) in toluene (10 mL) was added tris(pentafluorophenyl)borane (0.4 mmol, 204 mg). The mixture was stirred overnight after which time solvent was removed under reduced pressure to yield pure **8** as a colourless solid (0.38 g, 98%). <sup>1</sup>H NMR (d<sub>8</sub>-Tol): 7.10 – 6.86 (6H, s, Ar-*H*), 4.84 (1H, s, NC(CH<sub>3</sub>)CH), 3.03 (4H, sept, *J*<sub>HH</sub> = 6 Hz,

$\text{CH}(\text{CH}_3)_2$ ), 1.64 (1H, s,  $\text{MgH}$ ), 1.54 (6H, s,  $\text{NC}(\text{CH}_3)\text{CH}$ ), 1.09 (12H, d,  $J_{\text{HH}} = 6$  Hz,  $\text{CH}(\text{CH}_3)_2$ ), 0.97 (12H, d,  $J_{\text{HH}} = 6$  Hz,  $\text{CH}(\text{CH}_3)_2$ ).  $^{13}\text{C}\{^1\text{H}\}$  NMR ( $\text{d}_8\text{-Tol}$ , 125.76 MHz): 172.1 ( $\text{NC}(\text{CH}_3)\text{CH}$ ), 143.3 ( $o\text{-C}_6\text{F}_5$ ), 142.7 ( $o\text{-C-Dipp}$ ), 141.6 ( $p\text{-C}_6\text{F}_5$ ), 126.3 ( $p\text{-C-Dipp}$ ), 124.2 ( $m\text{-C}_6\text{F}_5$ ), 123.5 ( $m\text{-C-Dipp}$ ), 96.4 ( $\text{NC}(\text{CH}_3)\text{CH}$ ), 28.7 ( $\text{NC}(\text{CH}_3)\text{CH}$ ), 24.4 ( $\text{CH}(\text{CH}_3)_2$ ), 24.2 ( $\text{CH}(\text{CH}_3)_2$ ), 24.1 ( $\text{CH}(\text{CH}_3)_2$ ).  $^{11}\text{B}$  NMR ( $\text{d}_8\text{-Tol}$ , 96.6 MHz) -18.9 (d,  $^1J_{\text{HB}} = 67$  Hz,  $\text{HB}(\text{C}_6\text{F}_5)_3$ ). Anal. Calcd. for  $\text{C}_{47}\text{H}_{42}\text{BF}_{15}\text{MgN}_2$ : C, 59.11; H, 4.43; N, 2.93%. Found: C, 58.91; H, 4.57; N, 2.87%

### Synthesis of $[\text{HC}\{(\text{Me})\text{CN}(2,6\text{-}^1\text{PrC}_6\text{H}_3)\}_2\text{CaHB}(\text{C}_6\text{F}_5)_3(\text{THF})]$ , **9**.

In a glovebox, to a stirring solution of  $[\text{LCa}(\text{THF})(\text{N}(\text{Me}_2)\text{BH}_3)]$  (0.4 mmol, 235 mg) in toluene (10 mL) was added tris(pentafluorophenyl)borane (0.4 mmol, 204 mg). The mixture was stirred overnight after which time solvent was removed under reduced pressure to yield pure **9** as a colourless solid (0.41 g, 98%).  $^1\text{H}$  NMR ( $\text{d}_8\text{-tol}$ , 298 K)  $\delta = 1.02$  (d,  $J = 6.8$  Hz, 12H,  $\text{CH}(\text{CH}_3)_2$ ), 1.09 (d,  $J = 6.8$  Hz, 12H,  $\text{CH}(\text{CH}_3)_2$ ), 1.54 (s, 6H,  $\text{NC}(\text{CH}_3)$ ), ca. 2.4 (coincident m, ca. 1H,  $\text{BH}$ ), 2.97 (m, 4H,  $\text{CH}(\text{CH}_3)_2$ ), 4.80 (s, 1H,  $\text{C-H}$ ), 6.95 – 7.16 (m, 6H,  $\text{arom-H}$ ).  $^{13}\text{C}\{^1\text{H}\}$  NMR ( $\text{d}_8\text{-tol}$ , 298 K)  $\delta = 24.8$  ( $\text{CH}(\text{CH}_3)$ ), 24.9 ( $\text{CH}(\text{CH}_3)$ ), 25.0 ( $\text{CH}(\text{CH}_3)$ ), 25.5 ( $\text{CH}(\text{CH}_3)$ ), 28.9 ( $\text{NC}(\text{CH}_3)$ ), 124.5 ( $m\text{-C}_6\text{H}_3$ ), 124.7 ( $p\text{-C}_6\text{H}_3$ ), 141.8 ( $o\text{-C}_6\text{H}_3$ ), 143.1 ( $\text{HB}(m\text{-C}_6\text{F}_5)_3$ ), 145.2 ( $\text{HB}(p\text{-C}_6\text{F}_5)_3$ ), 146.5 ( $i\text{-C}_6\text{H}_3$ ), 146.9 ( $\text{HB}(o\text{-C}_6\text{F}_5)_3$ ).  $^{11}\text{B}$  NMR ( $\text{d}_8\text{-tol}$ , 298 K)  $\delta = -22.4$  (d,  $J = 86$  Hz,  $\text{HB}(\text{C}_6\text{F}_5)_3$ ).  $^{19}\text{F}$  NMR ( $\text{d}_8\text{-tol}$ , 298 K)  $\delta = -134.1$  (br. s, 4F,  $o\text{-C}_6\text{F}_5$ ),  $-159.3$  (br. s, 2F,  $p\text{-C}_6\text{F}_5$ ),  $-162.8$  (br. s, 4F,  $m\text{-C}_6\text{F}_5$ ). Anal. Calc. for  $\text{C}_{51}\text{H}_{50}\text{BCaF}_{15}\text{N}_2\text{O}$ : C: 58.74; H: 4.83; N: 2.69 %. Found: C: 58.62, 58.67; H: 4.76, 4.75; N: 2.62, 2.59%.

### Synthesis of $[(\text{C}_6\text{F}_5)_3\text{BOC}(\text{H})\text{OC}(\text{H})\{(\text{Me})\text{CN}(2,6\text{-}^1\text{PrC}_6\text{H}_3)\}_2\text{MgO}_2\text{CH}]_2$ , **10**

In a Youngs tap NMR tube, a solution of compound **8** (0.03 mmol, 30 mg) in  $\text{d}_8\text{-THF}$  (0.5 mL) was freeze thaw degassed and exposed to ~1 atm of  $\text{CO}_2$ . The sample was resealed and left at room temperature for two hours before NMR data were recorded. On concentration, the solution deposited crystals of compound **10** suitable for single crystal X-ray diffraction analysis (0.02 g, 64%).  $^1\text{H}$  NMR ( $\text{d}_8\text{-THF}$ ): 8.31 (1H, s,  $^1J_{\text{HH}} = 219.16$  Hz,  $\text{OC}(\text{H})\text{O}$ ), 7.09 – 6.96 (6H, s,  $\text{Ar-H}$ ), 4.70 (1H, s,  $^3J_{\text{HH}} = 7$  Hz,  $\text{NC}(\text{CH}_3)\text{CH}$ ), 3.18-3.06 (3H, three overlapping sept.,  $^3J_{\text{HH}} = 6$  Hz,  $\text{CH}(\text{CH}_3)_2$ ), 2.98 (1H, sept,  $^3J_{\text{HH}} = 6$  Hz,  $\text{CH}(\text{CH}_3)_2$ ), 1.88 (6H, s,  $\text{NC}(\text{CH}_3)\text{CH}$ ), 1.13, 1.08, 1.07, 1.02 (four 6H d,  $^3J_{\text{HH}} = 6$  Hz,  $\text{CH}(\text{CH}_3)_2$ ),  $^{13}\text{C}\{^1\text{H}\}$  NMR ( $\text{d}_8\text{-THF}$ , 125.76 MHz): 182.7 ( $\text{MgOC}(\text{H})\text{OMg}$ ), 173.5 ( $\text{BOC}(\text{CH})\text{O}$ ), 172.1 ( $\text{NC}(\text{CH}_3)\text{CH}$ ), 143.3 ( $o\text{-C}_6\text{F}_5$ ), 142.7

(*o*-C-Dipp), 141.6 (*p*-C<sub>6</sub>F<sub>5</sub>), 126.3 (*p*-C-Dipp), 124.2 (*m*-C<sub>6</sub>F<sub>5</sub>), 123.5 (*m*-C-Dipp), 96.4 (NC(CH<sub>3</sub>)CH), 28.7 (NC(CH<sub>3</sub>)CH), 24.4 (CH(CH<sub>3</sub>)<sub>2</sub>), 24.2 (CH(CH<sub>3</sub>)<sub>2</sub>), 24.1 (CH(CH<sub>3</sub>)<sub>2</sub>). <sup>11</sup>B NMR (d<sub>8</sub>-Tol, 96.6 MHz) -2.32 (s, OB(C<sub>6</sub>F<sub>5</sub>)<sub>3</sub>). Anal. Calcd. for C<sub>49</sub>H<sub>42</sub>BF<sub>15</sub>MgN<sub>2</sub>O<sub>4</sub>: C, 56.43; H, 4.06; N, 2.69%. Found: C, 55.81; H, 4.01; N, 2.64%

**Figure S1:** <sup>1</sup>H NMR spectrum of reaction of compound **8** with <sup>13</sup>CO<sub>2</sub> immediately after introduction of the carbon dioxide illustrating the rapid adduct formation with the β-diketiminato ligand (doublet signal at 4.71 ppm).

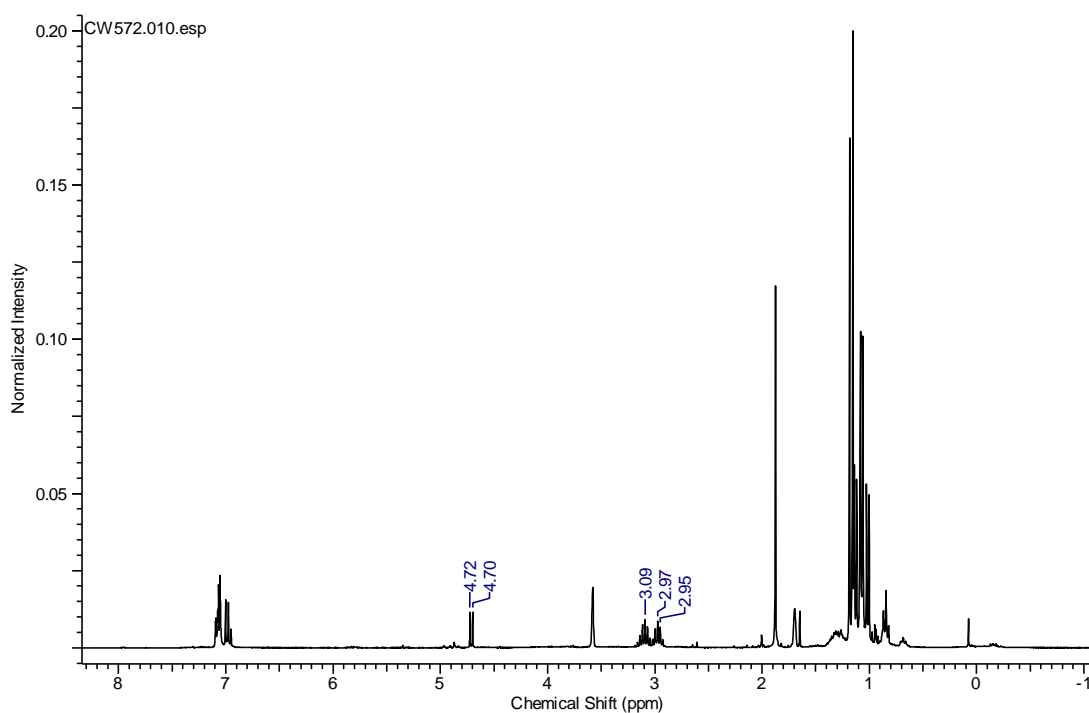

**Figure S2:**  $^{13}\text{C}\{^1\text{H}\}$  NMR spectrum of reaction of compound **8** with  $^{13}\text{CO}_2$  immediately after introduction of the carbon dioxide illustrating the rapid adduct formation with the  $\beta$ -diketiminato ligand (methine signal at 184.6 ppm).

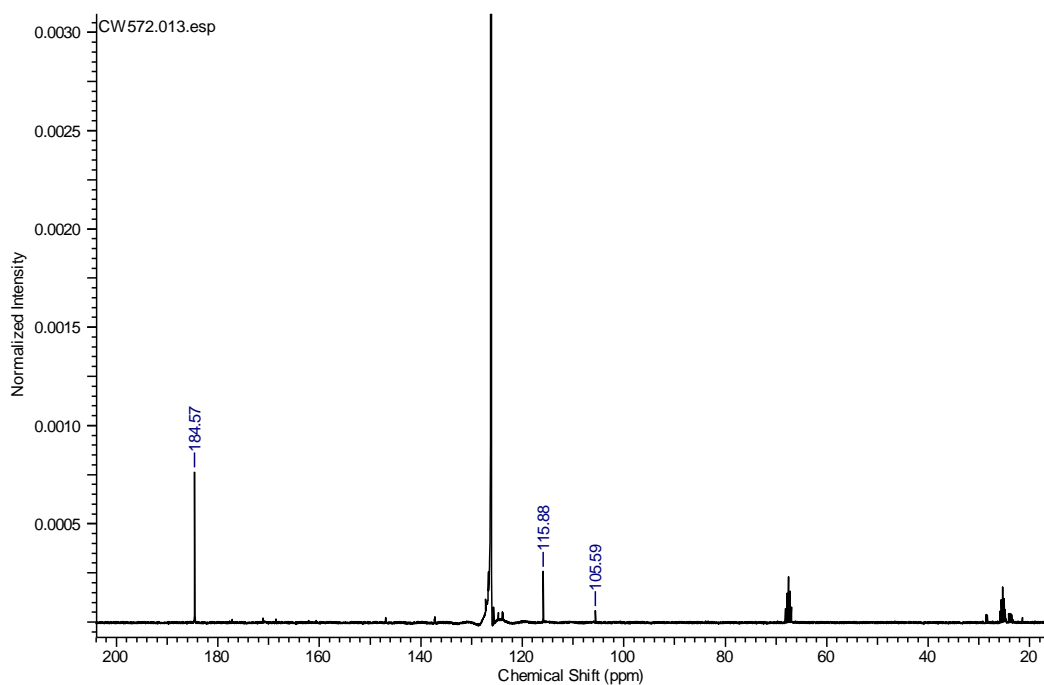

**Figure S3:**  $^1\text{H}$  NMR spectrum of reaction of compound **8** with  $^{13}\text{CO}_2$  after 15 hours illustrating the formation of the formate anion (doublet signal at 8.22 ppm).

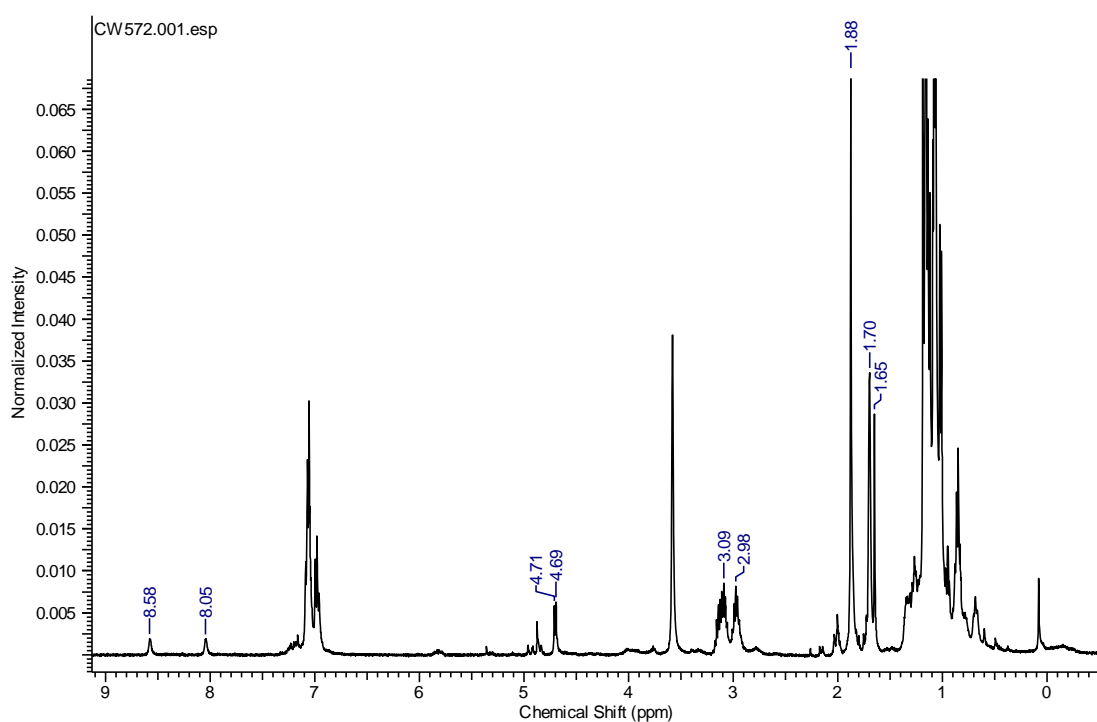

**Figure S4:**  $^{13}\text{C}\{^1\text{H}\}$  NMR spectrum of reaction of compound **8** with  $^{13}\text{CO}_2$  after 15 hours illustrating the formation of the formate anion (signal at 171.1 ppm).

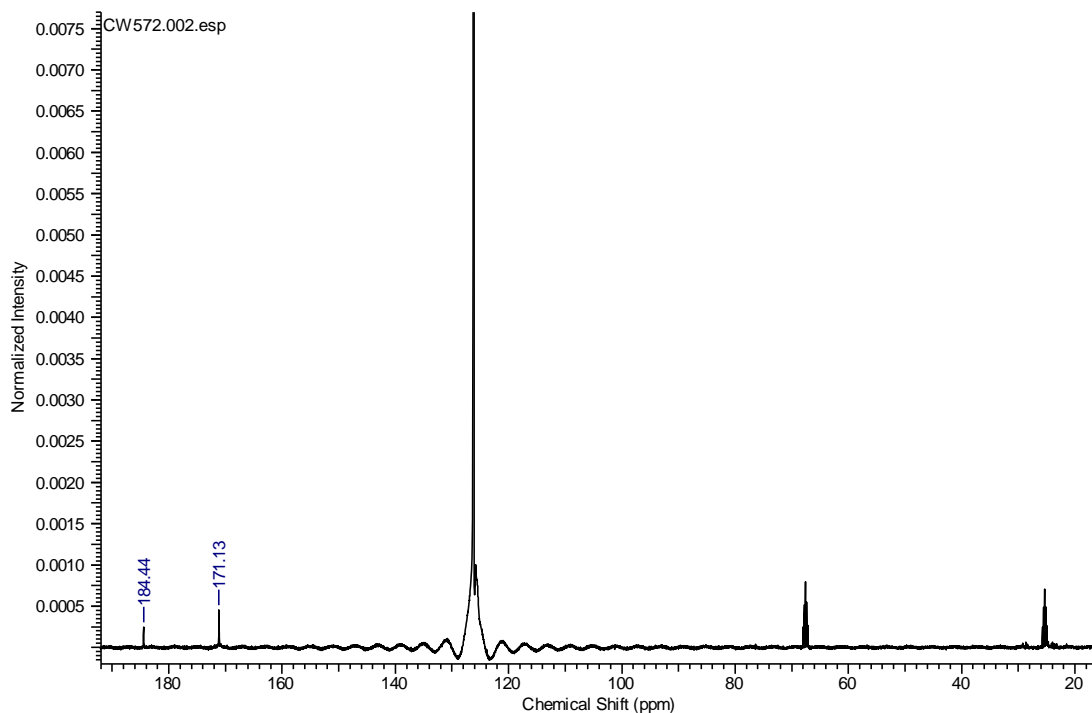

**Figure S5:**  $^1\text{H}$  NMR spectrum of reaction of compound **8** with  $^{13}\text{CO}_2$  after replacement of the  $^{13}\text{CO}_2$  atmosphere with  $\text{CO}_2$  illustrating the disappearance of the doublet signal at 4.70 ppm and retention of formate signal.

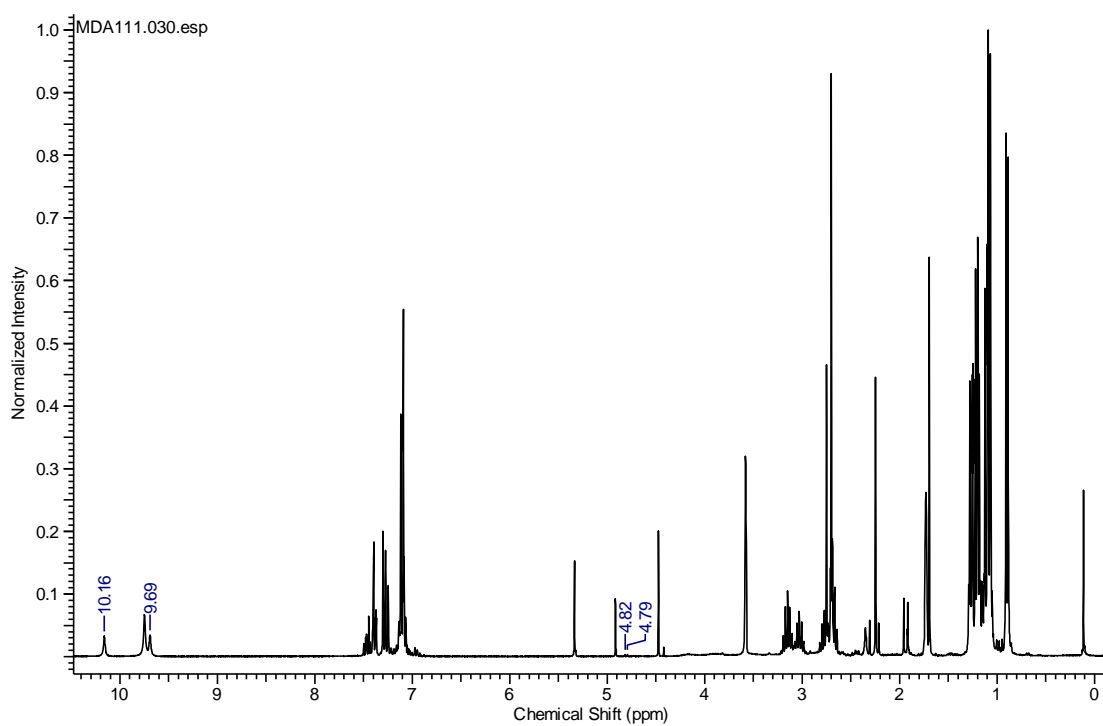

## Catalytic hydroboration of CO<sub>2</sub>

In a glovebox, to a vial containing compounds **8** or **9** or **10** (0.01 mmol), was added d<sub>8</sub>-THF (0.5 mL) followed by HBpin (0.1 mmol). The resultant solution was transferred to a NMR tube equipped with a Youngs tap which was sealed and removed from the glovebox. The solution was then freeze pumped thawed to remove argon and exposed to ~1 atm of CO<sub>2</sub>, resealed and warmed to 60°C. NMR analysis was performed at regular intervals and conversions were analyzed by ratios of starting material to product, with products identified by comparison to literature values.

**Figure S6:** <sup>11</sup>B NMR spectra recorded during catalysis by compound **8** after (bottom to top) 0, 10, 20, 30, 40, 50 and 60 hours illustrating the disappearance of the HBpin doublet signal (30.1 ppm) and the simultaneous formation of CH<sub>3</sub>OBpin (25.3 ppm) and (pinB)<sub>2</sub>O (24.3 ppm). The [HB(C<sub>6</sub>F<sub>5</sub>)<sub>3</sub>]<sup>−</sup> anion is observed to persist throughout the reaction at δ<sub>11B</sub> 22.5 ppm.

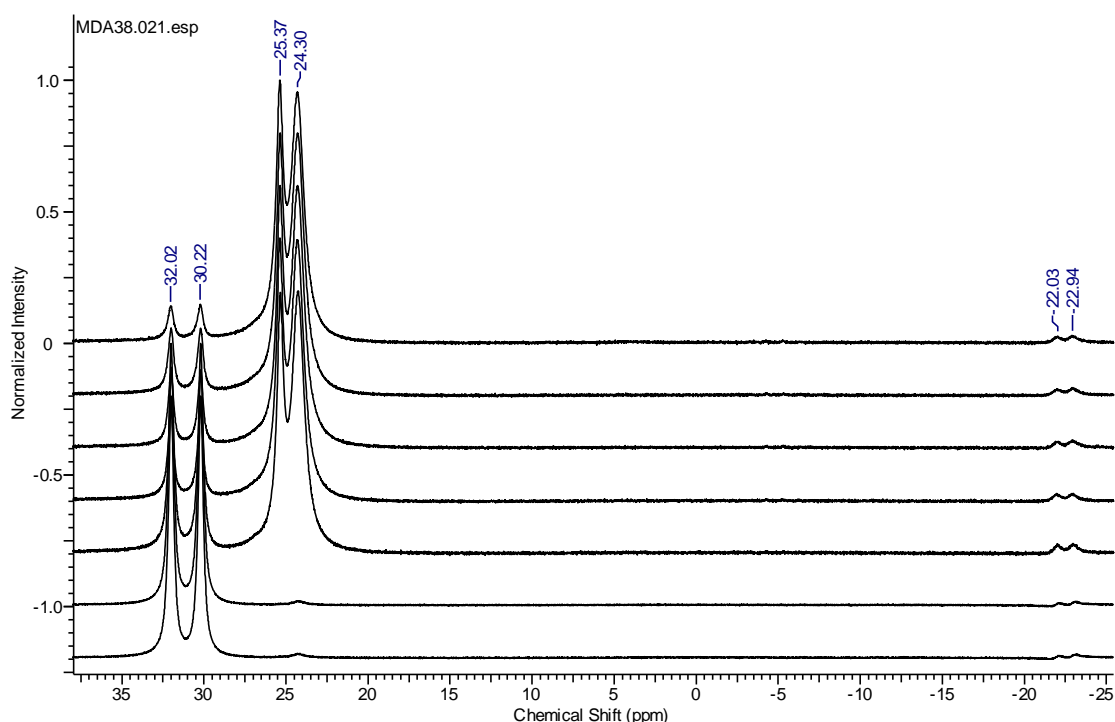

## Crystallographic experiments

Diffraction data for compounds **9** and **10** were collected on a Nonius Kappa CCD with a low temperature device at 150 K, utilizing Mo-K $\alpha$  radiation monochromated with graphite ( $\lambda = 0.71070$  Å). Processing utilised the Nonius software,<sup>2,3</sup> with structure solution and refinement using XSeed, SHELXS and SHELXL<sup>4</sup> and visualized utilising ORTEP 3.<sup>5</sup>

Table S1. Crystal data and structure refinement for **9**

|                                   |                                                                                                                             |
|-----------------------------------|-----------------------------------------------------------------------------------------------------------------------------|
| Identification code               | k13msh29                                                                                                                    |
| Empirical formula                 | C <sub>51</sub> H <sub>50</sub> B Ca F <sub>15</sub> N <sub>2</sub> O                                                       |
| Formula weight                    | 1042.82                                                                                                                     |
| Temperature                       | 150(2) K                                                                                                                    |
| Wavelength                        | 0.71073 Å                                                                                                                   |
| Crystal system                    | Monoclinic                                                                                                                  |
| Space group                       | P21/n                                                                                                                       |
| Unit cell dimensions              | a = 12.5666(1) Å $\alpha = 90^\circ$<br>b = 19.7682(2) Å $\beta = 107.382(1)^\circ$<br>c = 20.4056(2) Å $\gamma = 90^\circ$ |
| Volume                            | 4837.65(8) Å <sup>3</sup>                                                                                                   |
| Z                                 | 4                                                                                                                           |
| Density (calculated)              | 1.432 Mg/m <sup>3</sup>                                                                                                     |
| Absorption coefficient            | 0.228 mm <sup>-1</sup>                                                                                                      |
| F(000)                            | 2152                                                                                                                        |
| Crystal size                      | 0.60 x 0.50 x 0.40 mm                                                                                                       |
| Theta range for data collection   | 3.53 to 27.48 °                                                                                                             |
| Index ranges                      | -16 ≤ h ≤ 16; -25 ≤ k ≤ 25; -26 ≤ l ≤ 26                                                                                    |
| Reflections collected             | 66696                                                                                                                       |
| Independent reflections           | 11065 [R(int) = 0.0486]                                                                                                     |
| Reflections observed (>2sigma)    | 8333                                                                                                                        |
| Data Completeness                 | 0.996                                                                                                                       |
| Absorption correction             | Semi-empirical from equivalents                                                                                             |
| Max. and min. transmission        | 0.913 and 0.824                                                                                                             |
| Refinement method                 | Full-matrix least-squares on F <sup>2</sup>                                                                                 |
| Data / restraints / parameters    | 11065 / 19 / 672                                                                                                            |
| Goodness-of-fit on F <sup>2</sup> | 1.024                                                                                                                       |
| Final R indices [I>2sigma(I)]     | R1 = 0.0388 wR2 = 0.0873                                                                                                    |
| R indices (all data)              | R1 = 0.0615 wR2 = 0.0974                                                                                                    |
| Largest diff. peak and hole       | 0.254 and -0.239 eÅ <sup>-3</sup>                                                                                           |

**Notes:** Carbons C32 and C33 in the THF ligand are disordered over two sites in an 80:20 ratio. The minor fractional-occupancy carbons have been anisotropically refined subject to C-C distance and ADP restraints, in order to assist convergence. H1 (attached to B1) was located and refined freely.

Table S2. Crystal data and structure refinement for **10**

|                                   |                                                                                                   |
|-----------------------------------|---------------------------------------------------------------------------------------------------|
| Identification code               | h13msh5                                                                                           |
| Empirical formula                 | C <sub>56.80</sub> H <sub>50.60</sub> B F <sub>15</sub> Mg N <sub>2</sub> O <sub>4</sub>          |
| Formula weight                    | 1145.31                                                                                           |
| Temperature                       | 150(2) K                                                                                          |
| Wavelength                        | 0.71073 Å                                                                                         |
| Crystal system                    | Monoclinic                                                                                        |
| Space group                       | C2/c                                                                                              |
| Unit cell dimensions              | a = 25.2580(8) Å alpha = 90°<br>b = 12.8730(4) Å beta = 99.746(1)°<br>c = 34.507(1) Å gamma = 90° |
| Volume                            | 11057.9(6) Å <sup>3</sup>                                                                         |
| Z                                 | 8                                                                                                 |
| Density (calculated)              | 1.376 Mg/m <sup>3</sup>                                                                           |
| Absorption coefficient            | 0.130 mm <sup>-1</sup>                                                                            |
| F(000)                            | 4715                                                                                              |
| Crystal size                      | 0.30 x 0.25 x 0.07 mm                                                                             |
| Theta range for data collection   | 3.57 to 25.03 °                                                                                   |
| Index ranges                      | -29<=h<=29; -15<=k<=15; -41<=l<=41                                                                |
| Reflections collected             | 43618                                                                                             |
| Independent reflections           | 9215 [R(int) = 0.0672]                                                                            |
| Reflections observed (>2sigma)    | 5346                                                                                              |
| Data Completeness                 | 0.944                                                                                             |
| Absorption correction             | Semi-empirical from equivalents                                                                   |
| Max. and min. transmission        | 0.997 and 0.889                                                                                   |
| Refinement method                 | Full-matrix least-squares on F <sup>2</sup>                                                       |
| Data / restraints / parameters    | 9215 / 7 / 741                                                                                    |
| Goodness-of-fit on F <sup>2</sup> | 1.024                                                                                             |
| Final R indices [I>2sigma(I)]     | R1 = 0.0761 wR2 = 0.1862                                                                          |
| R indices (all data)              | R1 = 0.1395 wR2 = 0.2228                                                                          |
| Largest diff. peak and hole       | 0.405 and -0.340 eÅ <sup>-3</sup>                                                                 |

**Notes:** The asymmetric unit comprises ½ of a dimer molecule (proximate to a crystallographic inversion centre), one full molecule of benzene and an additional ½ molecule of benzene at 60% occupancy. C56 and C59 from the latter are coincident with a 2-fold rotation axis intrinsic to the space-group symmetry. As such, these 2 fractional occupancy carbons atoms exhibit 30% occupancy. Distance restraints were applied to this solvent moiety to assist convergence. The crystal was a weakly diffracting at higher Bragg angles (plate); hence data were truncated to 25°.

## References

- 1 D. J. Liptrot, M. S. Hill, M. F. Mahon and D. J. MacDougall, *Chem. Eur. J.* 2010, **16**, 8508.
- 2 M. C. Altomare, M. Burla, G. L. Camalli, C. Cascarano, A. Giacovazzo, A. G. G. Guagliardi, G. Moliterni and R. Polidori, *J. Appl. Cryst.* 1999, **32**, 115.

- 3 Z. Otwinowski and W. Minor, *DENZO-SMN Manual*, University of Texas Southwestern Medical Center, Dallas, USA, 1996.
- 4 G. M. Sheldrick, *SHELXL97-2, Program for Crystal Structure Refinement*, Universität Göttingen, Göttingen, Germany, 1998.
- 5 C. Barnes, *J. Appl. Cryst.* 1997, **30**, 568.
